# Supplementary material for: Trimethylamine-N-oxide accelerates osteoporosis by PERK activation of ATF5 unfolding
Source: PubMed Central journal article supplement — Cell Mol Life Sci. 2024 Dec 24;82(1):13. doi: 10.1007/s00018-024-05501-y (PMC11668722; doi:10.1007/s00018-024-05501-y), 2024-12-24
Supplement: 18_2024_5501_MOESM1_ESM.pdf [file 18_2024_5501_MOESM1_ESM.pdf]

**Fig. 7d**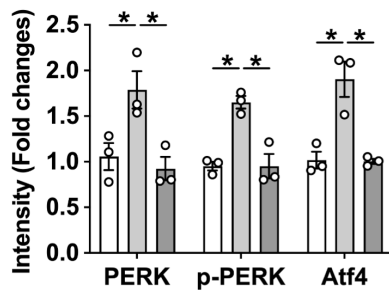**Fig. 7f**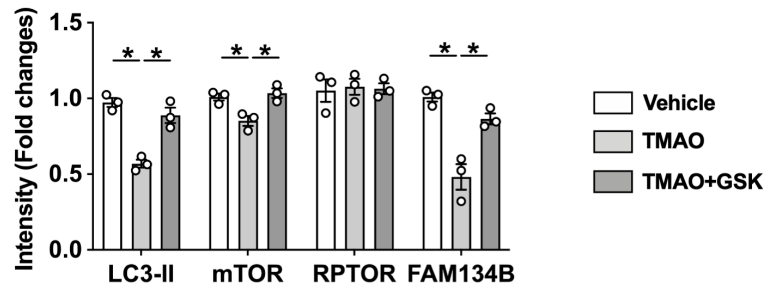**Fig. 8b**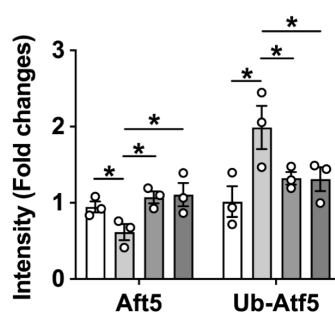**Fig. 8c**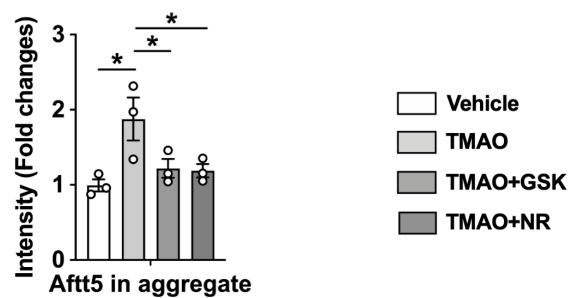**Fig. 8d**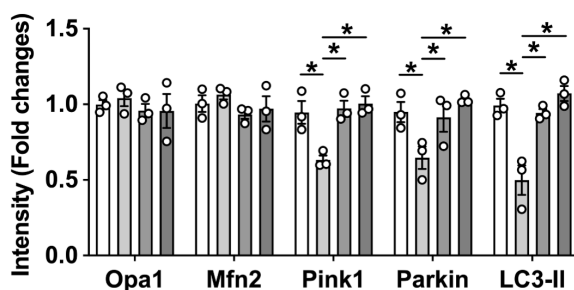**Fig. 8g**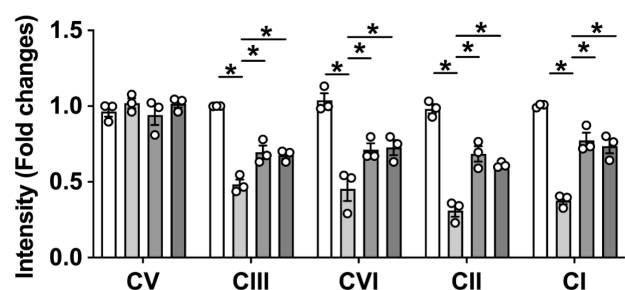

Figure S1: Quantitative analysis of immunoblotted protein band intensity in Fig. 7d, 7f, 8b, 8c, 8d, and 8g. Data are mean  $\pm$  standard errors calculated from 3 experiments. Asterisks (\*) stand for significant difference ( $P < 0.05$ ) analyzed by ANOVA test and post hoc Bonferroni test. GSK, GSK2606414; NR, nicotinamide riboside.
