# Supplementary material for: Trimethylamine-N-oxide accelerates osteoporosis by PERK activation of ATF5 unfolding
Source: PubMed Central journal article supplement — Cell Mol Life Sci. 2024 Dec 24;82(1):13. doi: 10.1007/s00018-024-05501-y (PMC11668722; doi:10.1007/s00018-024-05501-y), 2024-12-24
Supplement: 18_2024_5501_MOESM3_ESM.pdf [file 18_2024_5501_MOESM3_ESM.pdf]

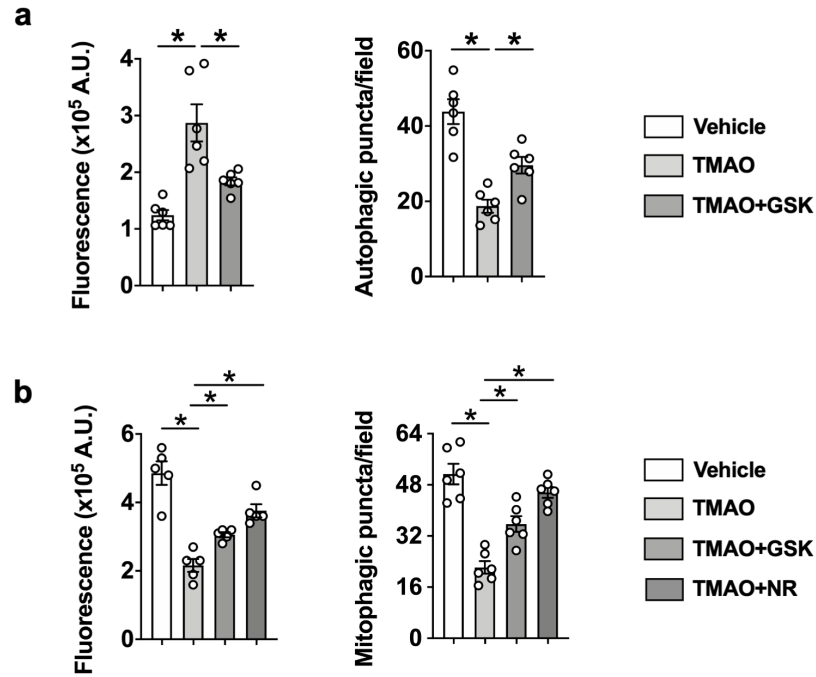

Figure S3: Quantitative analysis of ER-tracker fluorescence intensity, autophagic puncta (a), MitoTracker fluorescence intensity, and mitophagic puncta (b) of osteoblasts. Data are mean  $\pm$  standard errors calculated from 5 – 6 experiments. Asterisks (\*) stand for significant difference ( $P < 0.01$ ) analyzed by ANOVA test and post hoc Bonferroni test. GSK, GSK2606414; NR, nicotinamide riboside.
