# Supplementary figures and images for: Trimethylamine-N-oxide accelerates osteoporosis by PERK activation of ATF5 unfolding
Source: PubMed Central journal article supplement — Cell Mol Life Sci. 2024 Dec 24;82(1):13. doi: 10.1007/s00018-024-05501-y (PMC11668722; doi:10.1007/s00018-024-05501-y), 2024-12-24

Fig. 7d

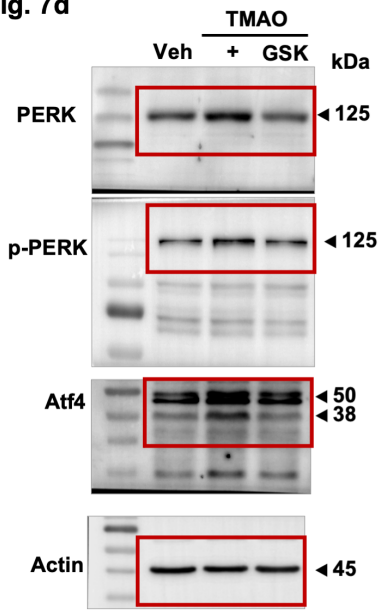

Fig. 7f

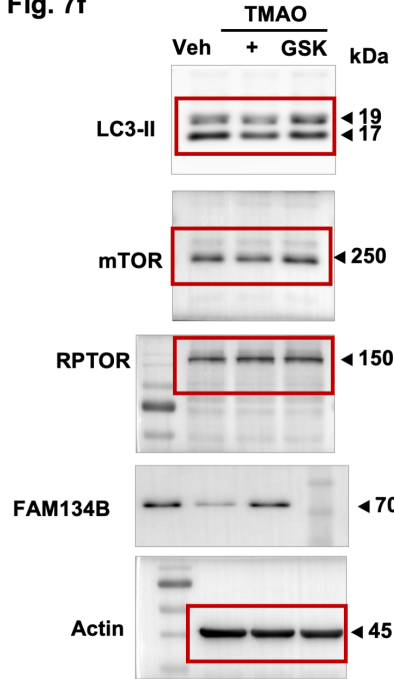

Fig. 8b

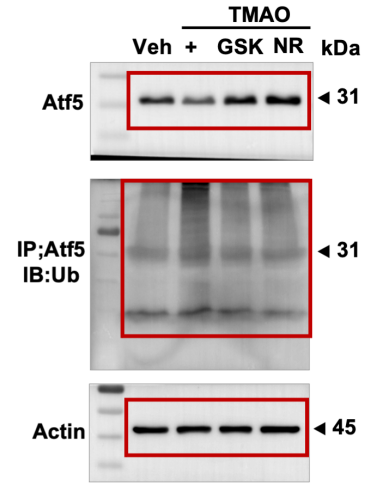

Fig. 8c

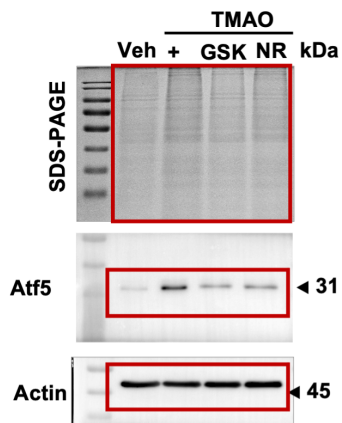

Fig. 8d

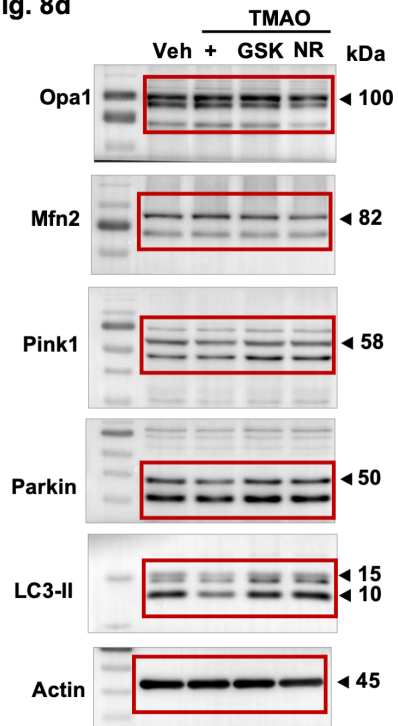

Fig. 8g

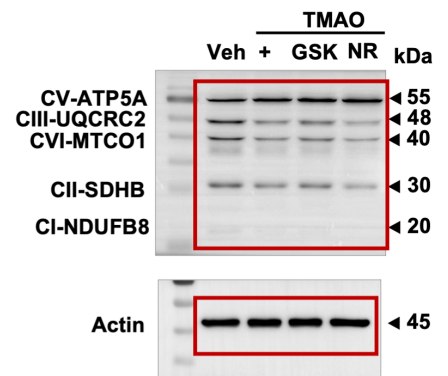

Fig. S2: Original images of immunoblots in Fig. 7d, 7f, 8b, 8c, 8d and 8g

Supplement: 18_2024_5501_MOESM2_ESM.pdf [file 18_2024_5501_MOESM2_ESM.pdf]
